# Supplementary material
Source: Springer Nature journal article supplement (https://www.springermedizin.de/resource/supplementary/12865_2003_42_MOESM1_ESM.pdf/9428434)

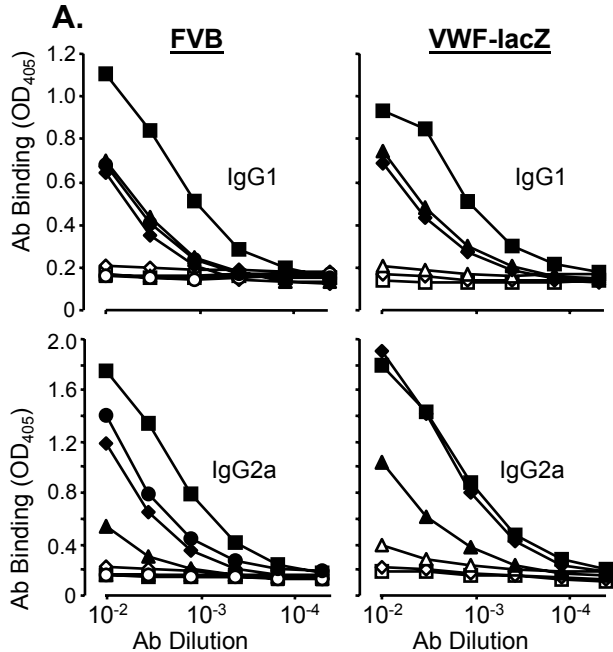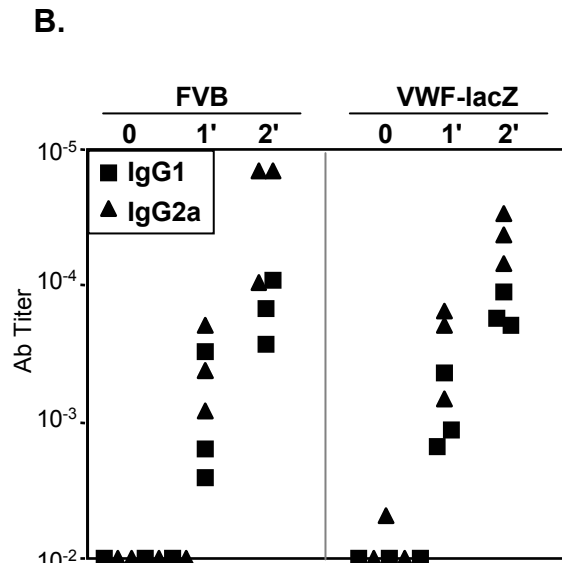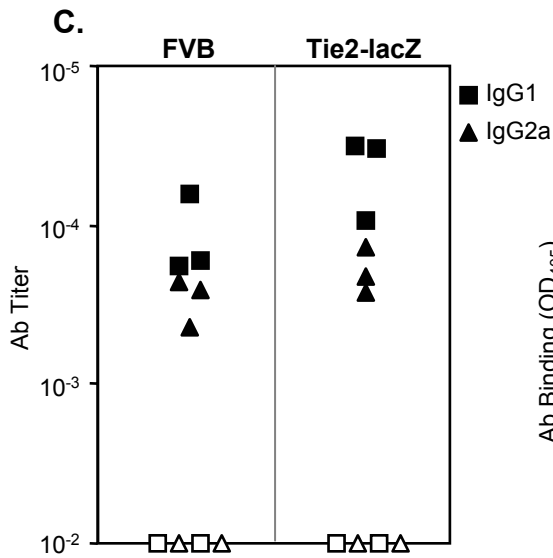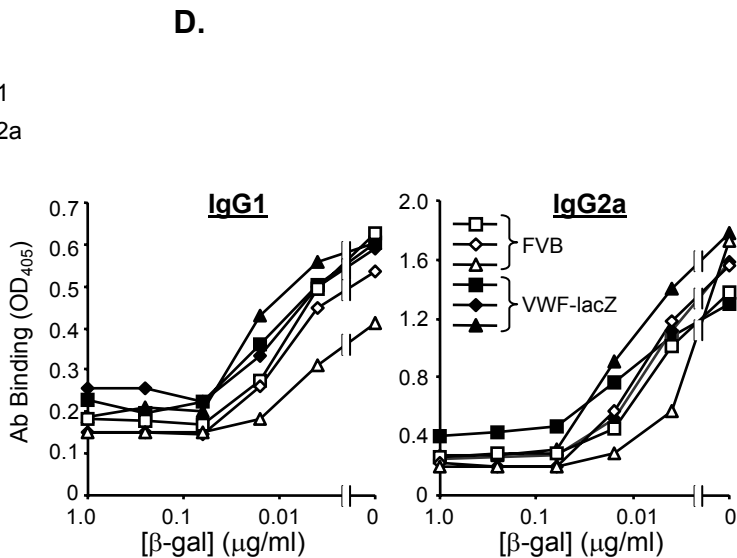

Supplement: MOESM1 [file 9428434]
